# Supplementary material
Source: PubMed Central journal article supplement (PMC7132804)
Supplement: develop-147-186213-s1.pdf [file develop-147-186213-s1.pdf]

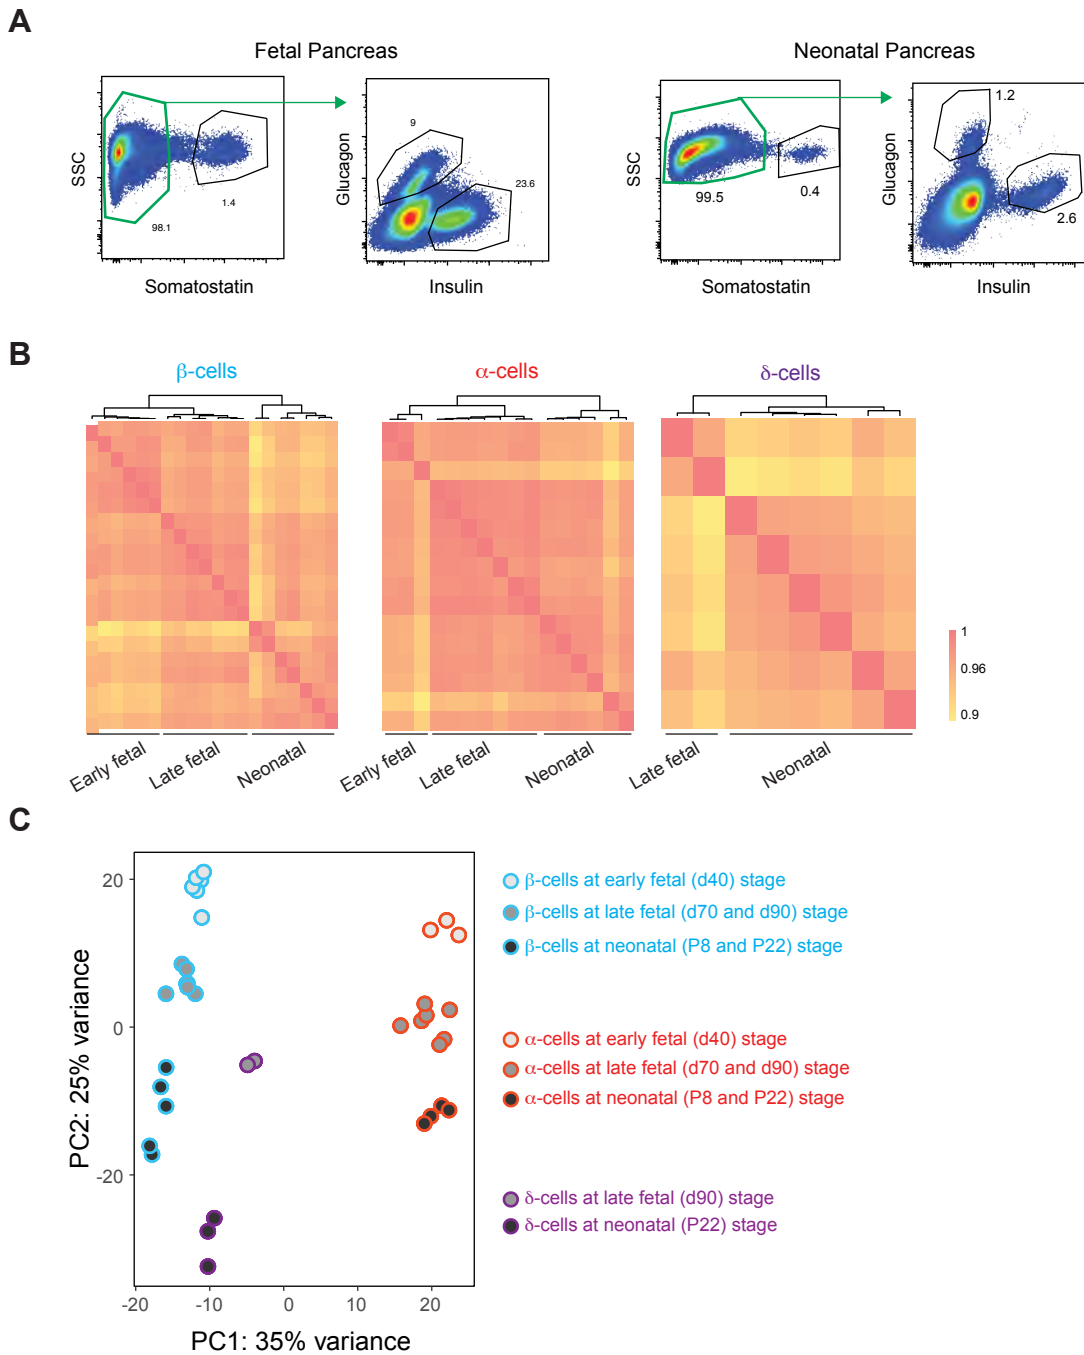

Fig. S1. (A) FACS plots demonstrating distinct populations of Insulin (INS) positive  $\beta$ -, glucagon (GCG) positive  $\alpha$ - and somatostatin (SST) positive  $\delta$ -cells among dispersed fetal and neonatal pancreatic cells. (B) Pearson correlation matrix of all RNA-seq samples used in this study demonstrating distinct stage specific gene expression patterns in  $\beta$ -,  $\alpha$ -, and  $\delta$ -cells (C) Principal Component Analysis indicating the RNA-Seq libraries cluster according to cell type in principle component 1, followed by developmental stage in principle component 2

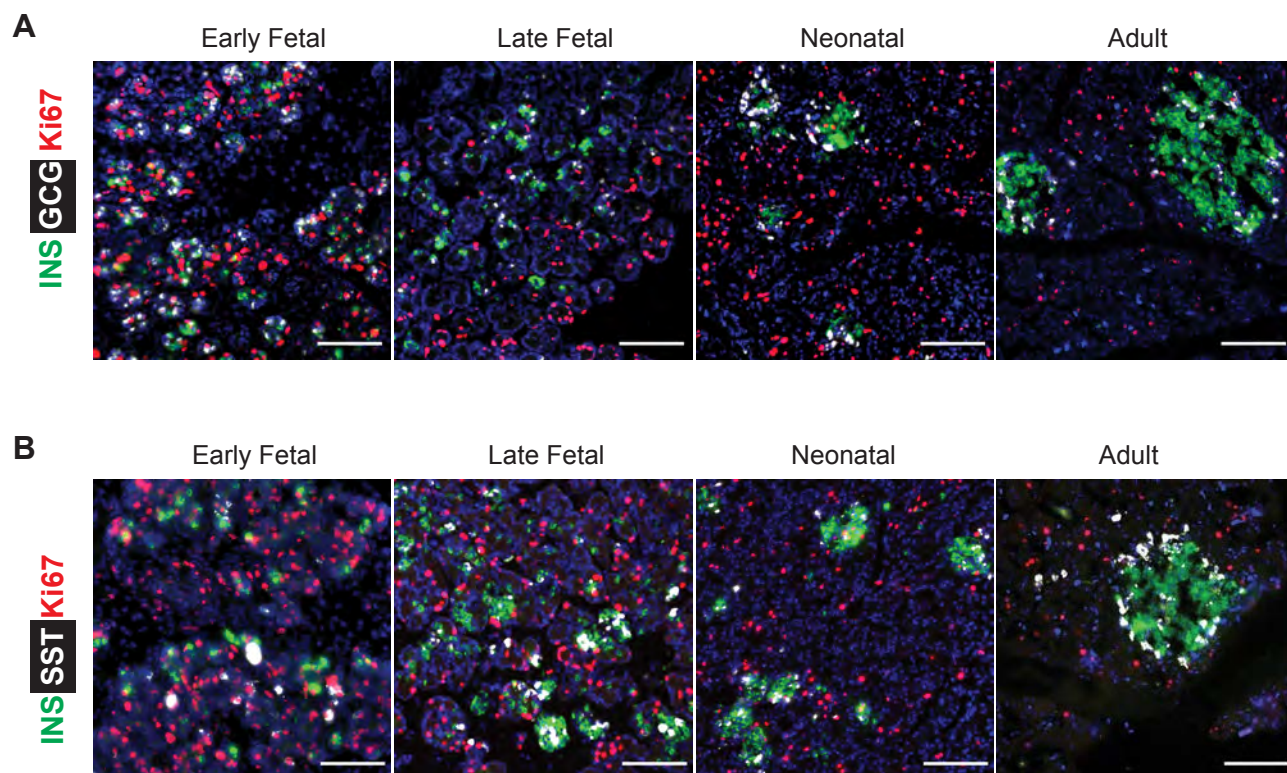

Fig. S2. Representative immunofluorescence images showing (A) Insulin and Glucagon or (B) Insulin and Somatostatin co-stained with Ki67 (Scale bars, 100  $\mu$ m)

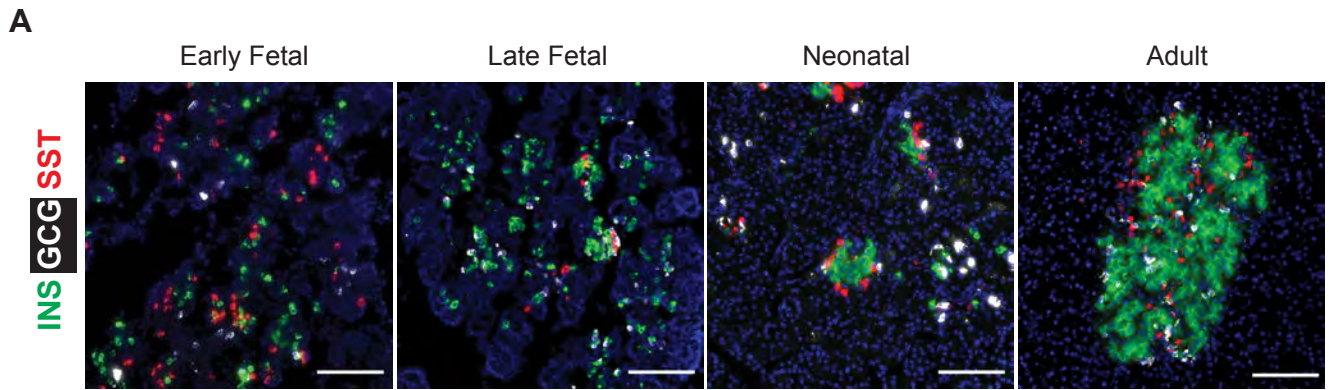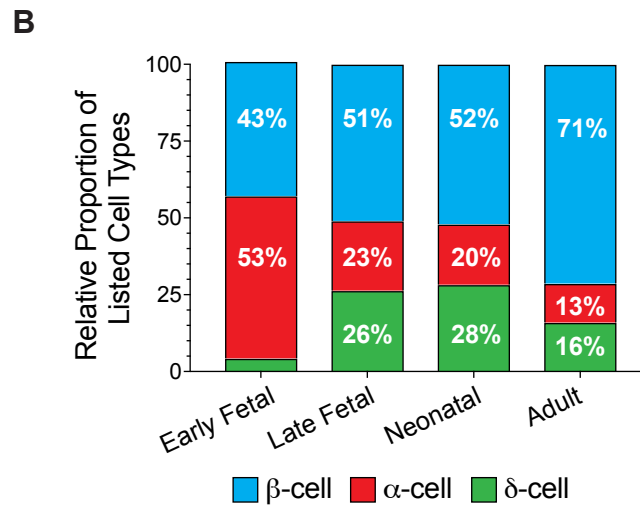

Fig. S3. Representative immunofluorescence images (A) and (B) their quantification graphs showing relative proportion of INS+, GCG+ and SST+ cells in each developmental stage (n = 40 images per group, from 3 pigs per group, Scale bars, 100  $\mu$ m)

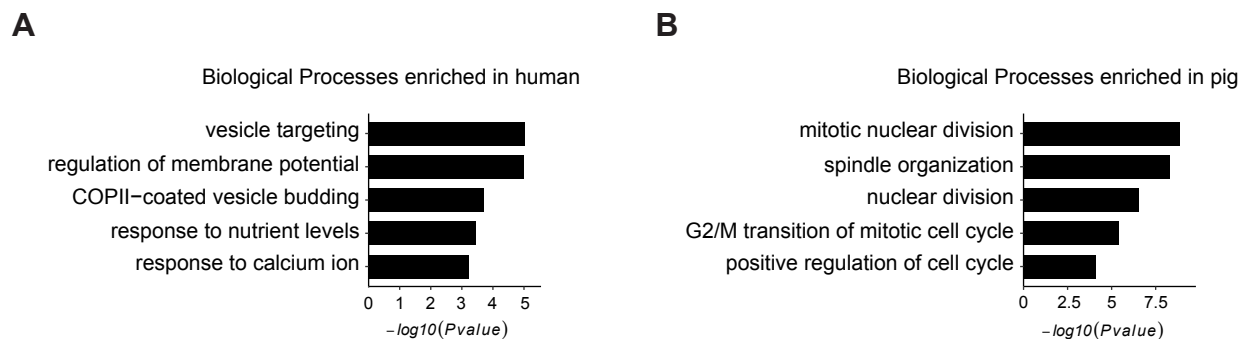

Fig. S4. Enriched GO terms with genes enriched in (A) human and (B) pig  $\beta$ -cells at neonatal stage. Adjusted p value threshold was 0.05.

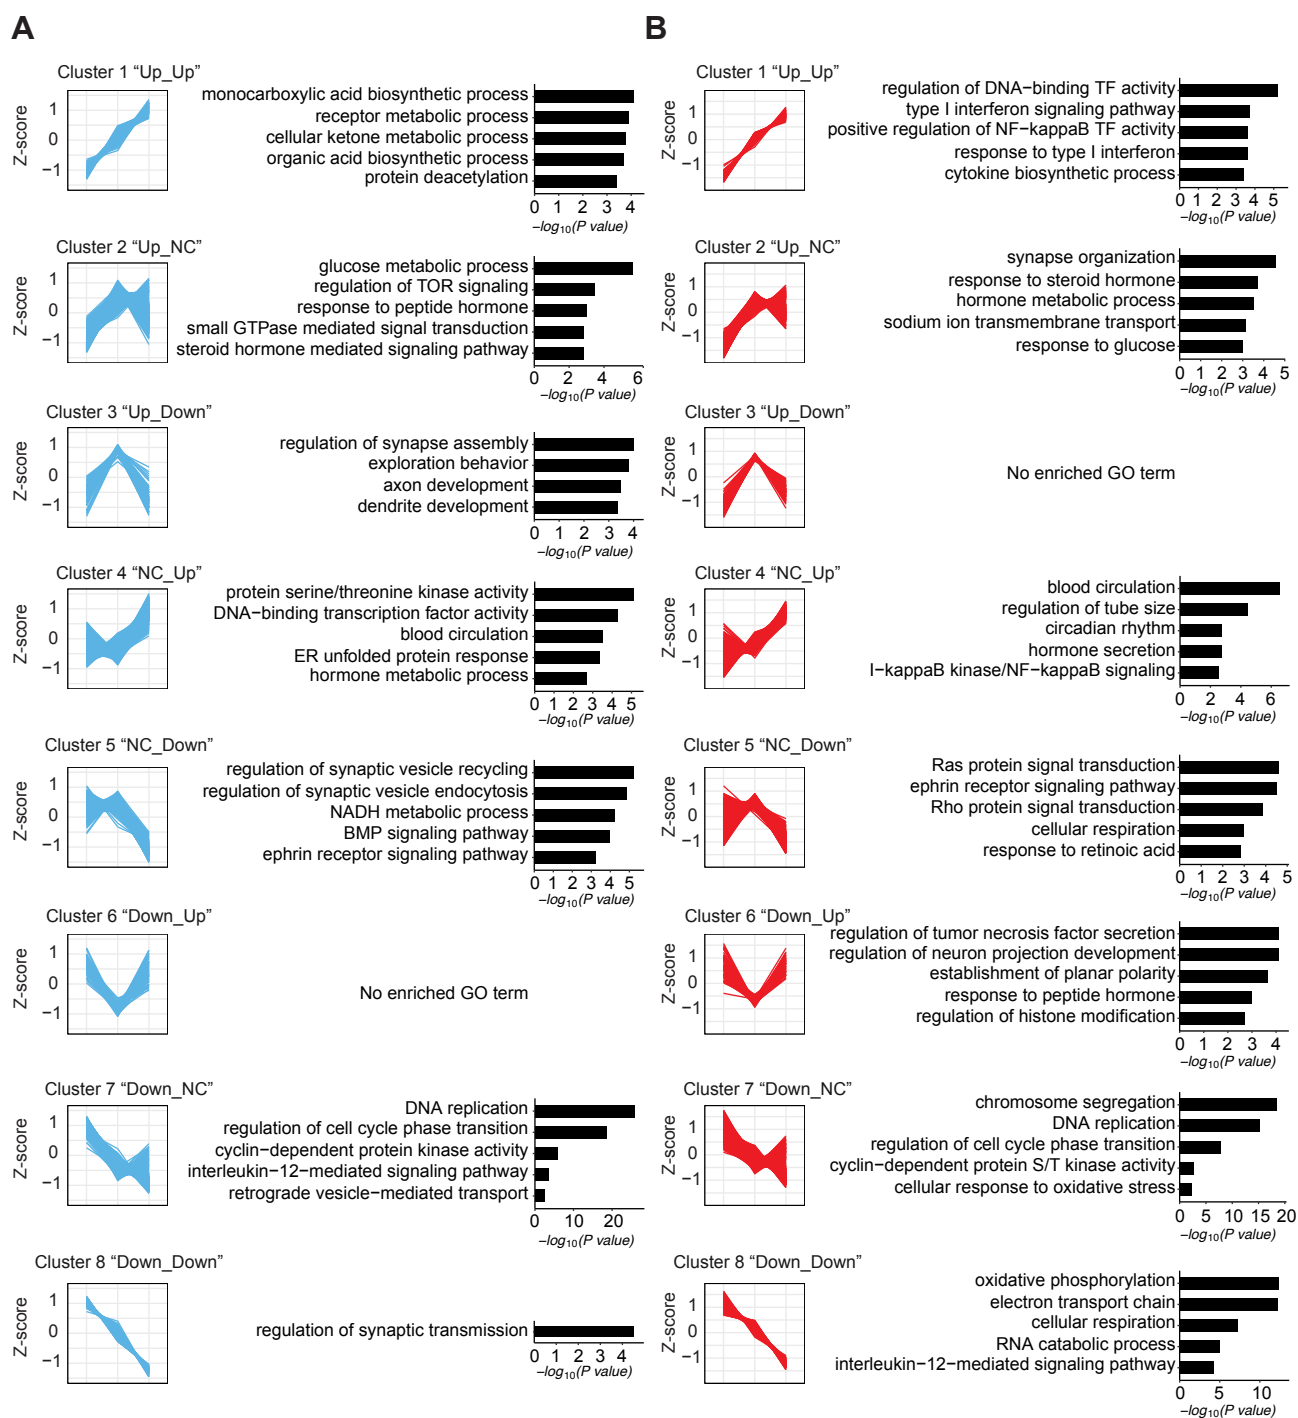

Fig. S5. (A, B) Visualization of gene expression change with z score representing  $\log_2(X+1)$  transformed TPM counts of genes in 8 clusters. Genes were clustered based on expression changes from early fetal stage to neonatal day 22 in  $\beta$ - (A) and  $\alpha$ - (B) cells. Enriched GO terms with genes in each cluster are shown to the right. Adjusted p value threshold was 0.1.

## Supplementary Tables

**Table S1.** List of RNA-Seq libraries sequenced in this study

[Click here to Download Table S1](#)

**Table S2.** Differentially expressed genes in pig  $\beta$ -,  $\alpha$ -, and  $\delta$ -cells between two developmental stages  
(Early fetal vs Late fetal, Late fetal vs Neonatal)

[Click here to Download Table S2](#)

**Table S3.** TPM counts of genes in each RNA-seq library

[Click here to Download Table S3](#)

**Table S4.** Genes which are developmentally regulated in human and pig islet cells

[Click here to Download Table S4](#)

**Table S5.** Differentially expressed genes and GO term analysis comparing neonatal human and pig  $\beta$ -cells.

[Click here to Download Table S5](#)

**Table S6.** Genes with dynamic expression in pig  $\beta$ - and  $\alpha$ -cells from early fetal to neonatal stages.

[Click here to Download Table S6](#)

**Table S7.** MODY and NDM genes which are developmentally regulated in human and pig islet cells

[Click here to Download Table S7](#)

**Table S8.** Up- and down-regulated genes in pig  $\beta$ -cells between late fetal and P22.

[Click here to Download Table S8](#)

**Table S9.** GO term analysis in pig  $\beta$ -cells between late fetal and P22.

[Click here to Download Table S9](#)
